# Supplementary material
Source: PubMed Central journal article supplement (PMC7321964)
Supplement: pnas.1918163117.sapp.pdf [file pnas.1918163117.sapp.pdf]

# PNAS

www.pnas.org

Supplementary Information for

**Myeloid ALX/FPR2 regulates vascularization following tissue injury**

Brian E. Sansbury<sup>a</sup>, Xiaofeng Li<sup>a</sup>, Blenda Wong<sup>a</sup>, Andreas Patsalos<sup>b</sup>, Nikolas Giannakis<sup>c</sup>, Michael J. Zhang<sup>d</sup>, Laszlo Nagy<sup>b,c</sup> and Matthew Spite<sup>a</sup>

<sup>a</sup>Center for Experimental Therapeutics and Reperfusion Injury, Department of Anesthesiology, Perioperative and Pain Medicine, Brigham and Women's Hospital and Harvard Medical School, Boston, MA, USA.

<sup>b</sup>Departments of Medicine and Biological Chemistry, Johns Hopkins University of School of Medicine and Johns Hopkins All Children's Hospital, St. Petersburg, FL, USA.

<sup>c</sup>Department of Biochemistry and Molecular Biology, Faculty of Medicine, University of Debrecen, Debrecen H-4032, Hungary.

<sup>d</sup>Department of Medicine, University of Minnesota Medical School, Minneapolis, MN, USA.

Address correspondence to: Matthew Spite, Ph.D. Hale Building for Transformative Medicine, Room 3016K, Boston, MA 02115; Ph: 617-525-5133; E-mail: [mspite@bwh.harvard.edu](mailto:mspite@bwh.harvard.edu)

**This PDF file includes:**

Figures S1 to S4

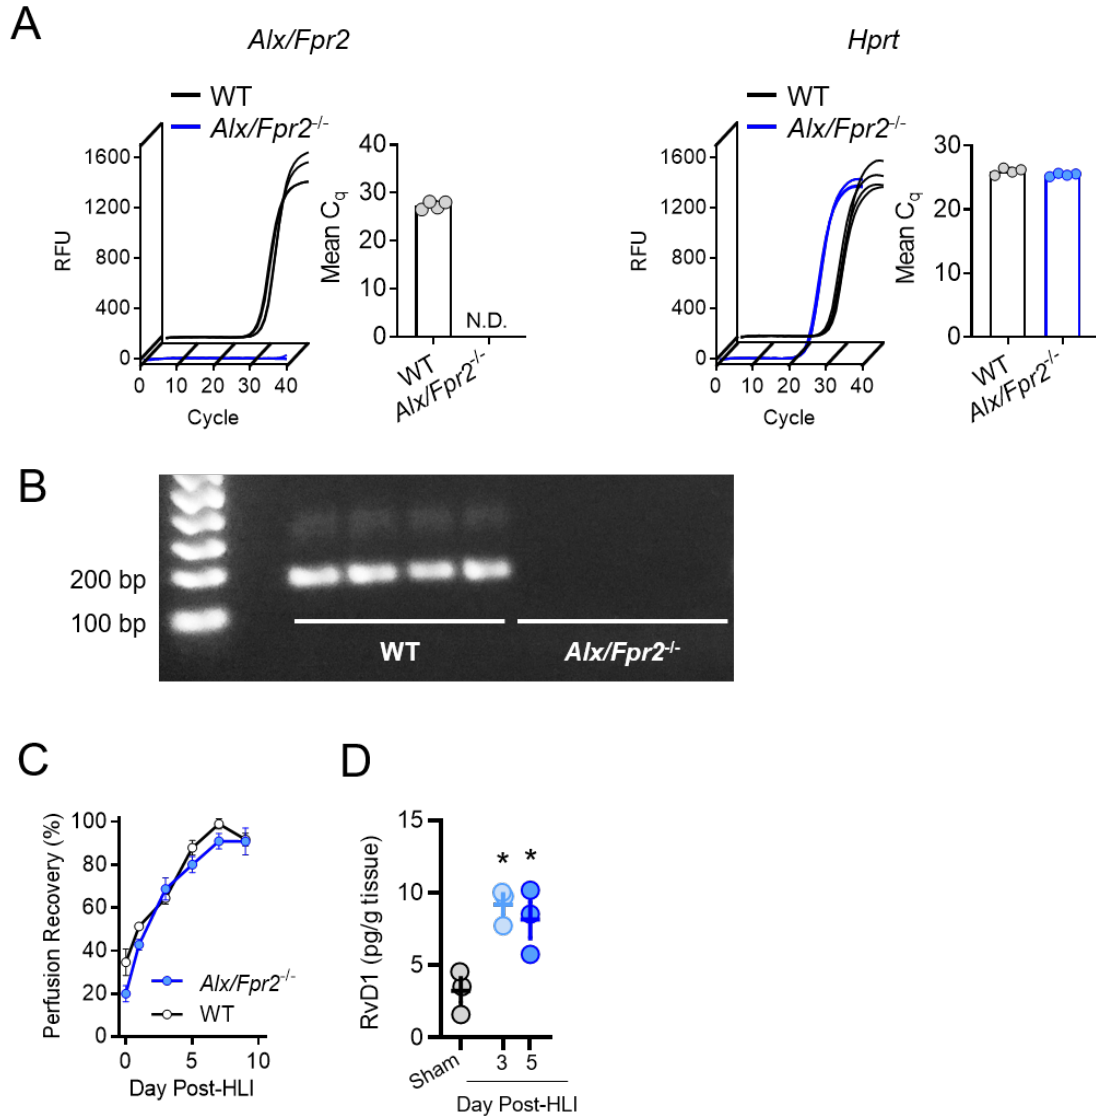

**Figure S1. Validation of *Alx/Fpr2* gene deletion and its effect on perfusion recovery in female mice and RvD1 biosynthesis in ischemia.** Expression of *Alx/Fpr2* and *Hprt* in BMDM from wild type (WT) and *Alx/Fpr2*<sup>-/-</sup> mice was measured by qRT-PCR (A) shown in relative fluorescence units (RFU) and number of cycles required for signal amplification (Mean Cq) and (B) by gel electrophoresis. n=4 per genotype. (C) Quantification of perfusion recovery measured by laser speckle contrast perfusion imaging in WT and *Alx/Fpr2*<sup>-/-</sup> female mice following HLI. n=5-7 per genotype. (D) Quantification of RvD1 measured by LC-MS/MS in ischemic limb skeletal muscle of male *Alx/Fpr2*<sup>-/-</sup> undergoing HLI. n=3 per group at each time point. Graphs represent mean ± SEM; (D) unpaired Student's *t*-test vs. Sham, \**p*<0.05.

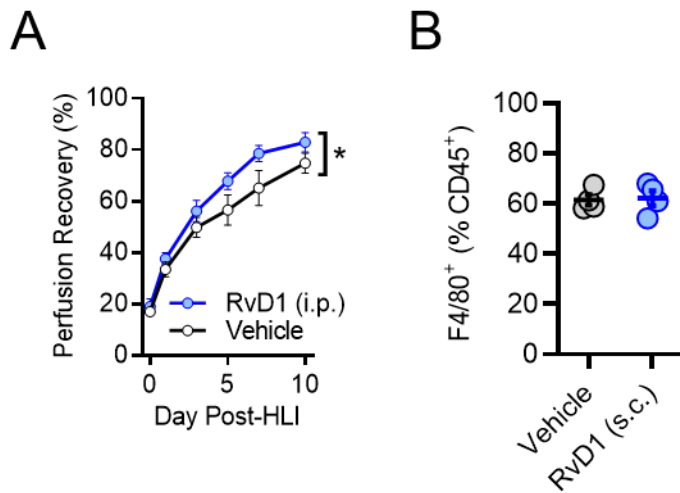

**Figure S2. Systemic administration of RvD1 improves perfusion recovery while local delivery does not affect macrophage recruitment.** Quantification of perfusion recovery measured by laser speckle contrast perfusion imaging in WT mice following HLI with daily intraperitoneal administration of RvD1 (4 $\mu$ g/kg; i.p.). n=4 per group. (B) Levels of CD45<sup>+</sup>F4/80<sup>+</sup> leukocytes in ischemic skeletal muscle of WT mice on day 3 of HLI after daily subcutaneous administration of RvD1 (4 $\mu$ g/kg; s.c.). n=4 per group. (A) two-way ANOVA, \* $p$ <0.05.

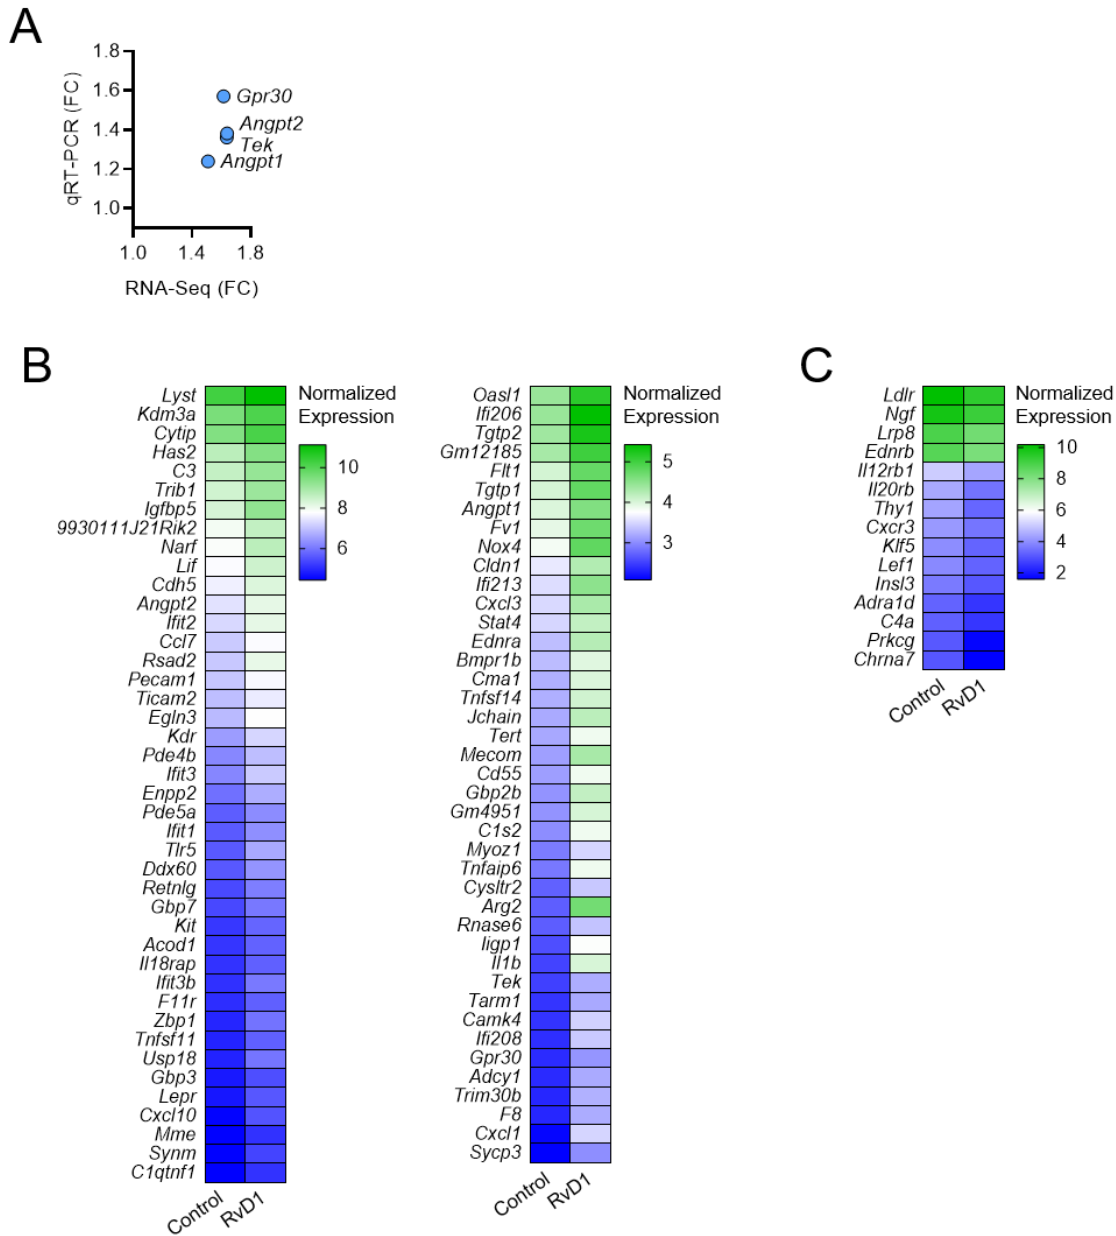

**Figure S3. Validation of gene expression changes by qRT-PCR and RvD1-induced expression changes in immunity/host defense-related genes.** BMDM were stimulated with RvD1 (10nM; 6 hours) then subjected to qRT-PCR or RNA-Sequencing. (A) Correlation plot showing fold change (FC) of gene expression in RvD1-stimulated BMDM as measured by qRT-PCR vs. RNA-Seq. The component genes that make up each of the immunity/host defense-related GO pathways that were upregulated (B) or downregulated (C) by RvD1 as determined by RNA-Seq analysis are shown in heatmaps listed by decreasing normalized expression. n=6 for qRT-PCR; n=3 for RNA-Seq.

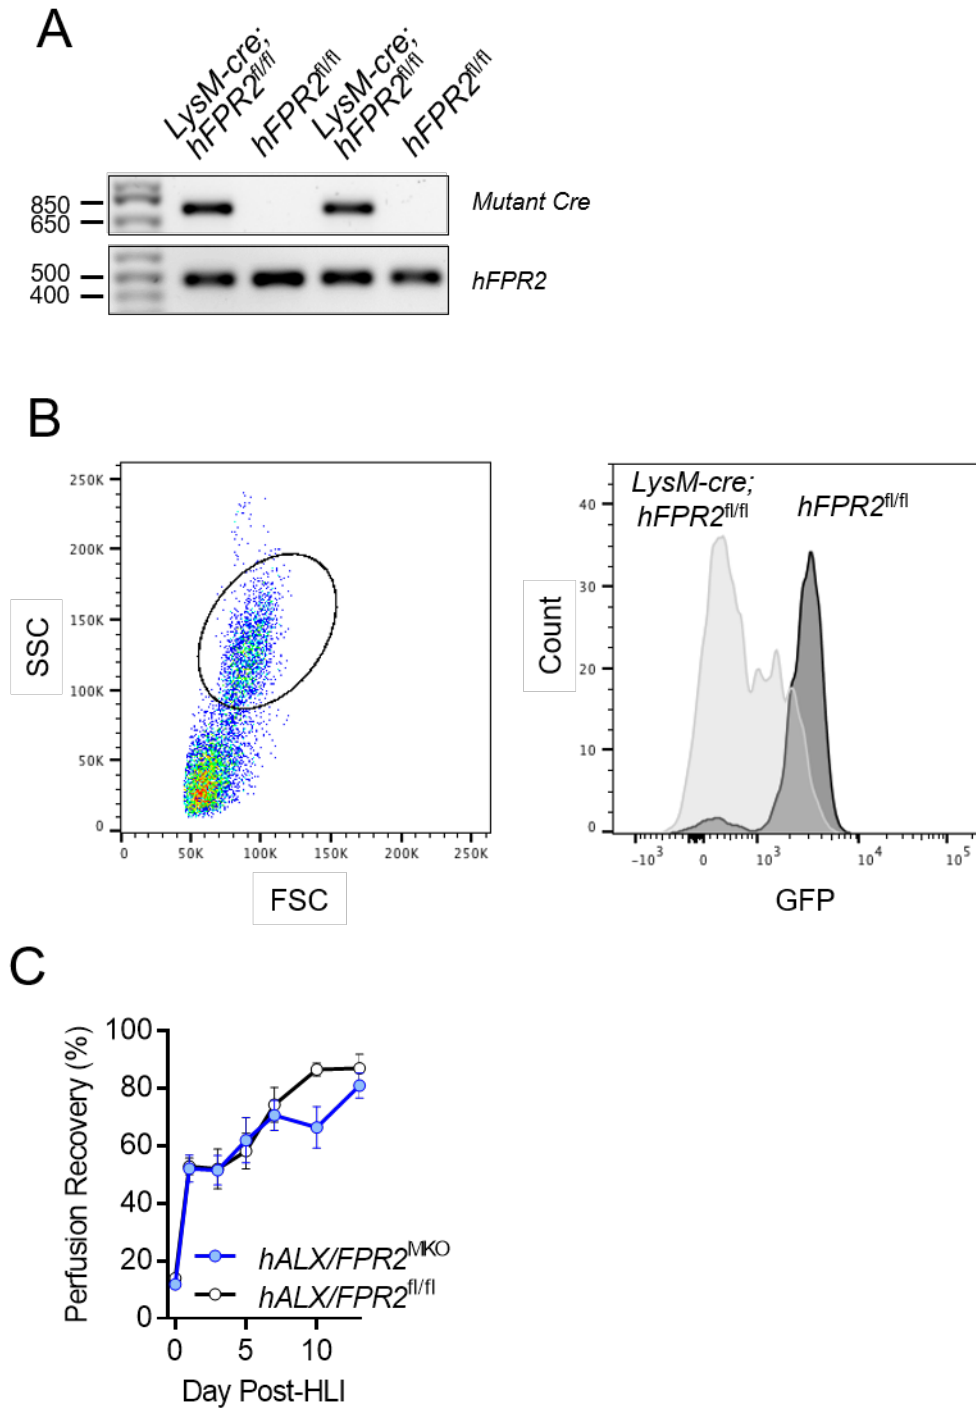

**Figure S4. Validation of myeloid-specific *hALX/FPR2* gene deletion and its effect on perfusion recovery in female mice.** (A) Representative PCR of DNA from tails of *LysM-cre;FPR2<sup>fl/fl</sup>* and *hFPR2<sup>fl/fl</sup>* mice. (B) Flow cytometric analysis of GFP expression in peripheral blood leukocytes from *LysM-cre;hFPR2<sup>fl/fl</sup>* and control (*hFPR2<sup>fl/fl</sup>*) mice. (C) Quantification of perfusion recovery measured by laser speckle contrast perfusion imaging in *hALX/FPR2<sup>fl/fl</sup>* and *hALX/FPR2<sup>MKO</sup>* female mice following HLI. n=5-7 per genotype.
